# Supplementary material for: Use of insulin glargine and cancer incidence in Scotland: a study from the Scottish Diabetes Research Network Epidemiology Group
Source: Springer Nature journal article supplement (doi:10.1007/s00125-009-1453-1), 2009-07-14
Supplement: 125_2009_1453_MOESM1_ESM.pdf [file 125_2009_1453_MOESM1_ESM.pdf]

## Electronic supplementary material

**ESM Table 1** Baseline characteristics of cohort of incident insulin users by insulin glargine exposure group: type 2 diabetic patients only

| Characteristic                                              | Data presented as | Non-glargine insulin | Non-glargine plus glargine insulin | Insulin glargine only | <i>p</i> value <sup>a</sup> |
|-------------------------------------------------------------|-------------------|----------------------|------------------------------------|-----------------------|-----------------------------|
| Subjects, <i>n</i> =12,852                                  | % ( <i>n</i> )    | 79.8 (10,262)        | 5.4 (690)                          | 14.8 (1900)           |                             |
| Sex, % women                                                | % ( <i>n</i> )    | 46.4 (4,761)         | 40.4 (279)                         | 48.7 (926)            | 0.050                       |
| Age, years                                                  | median (LQ, UQ)   | 63 (54, 71)          | 58 (46, 69)                        | 67 (58, 75)           | <0.0001                     |
| BMI, kg/m <sup>2</sup>                                      | mean (SD)         | 29.9 (6.3)           | 29.3 (6.9)                         | 30.5 (6.3)            | <0.0001                     |
| Systolic BP, mmHg                                           | mean (SD)         | 137.7 (21.9)         | 135.3 (22.6)                       | 139.8 (23.2)          | 0.070                       |
| Diastolic BP, mmHg                                          | mean (SD)         | 76.8 (12.3)          | 77.6 (13.1)                        | 77.8 (12.5)           | <0.0001                     |
| HbA <sub>1c</sub> , %                                       | mean (SD)         | 9.9 (2.1)            | 9.8 (2.2)                          | 9.9 (1.9)             | 0.10                        |
| Duration of diabetes                                        |                   |                      |                                    |                       |                             |
| ≥5 years                                                    | % ( <i>n</i> )    | 67.8 (6,962)         | 58.0 (400)                         | 82.7 (1,571)          | <0.0001                     |
| Age at diagnosis, years                                     | median            | 55                   | 50                                 | 57                    | 0.0001                      |
| Prior cancer                                                |                   |                      |                                    |                       |                             |
| Ever                                                        | % ( <i>n</i> )    | 8.7 (894)            | 6.4 (44)                           | 9.8 (187)             | 0.51                        |
| ≤5 years ago                                                | % ( <i>n</i> )    | 5.2 (530)            | 4.6 (32)                           | 5.5 (105)             | 0.73                        |
| Prior CVD                                                   | % ( <i>n</i> )    | 39.6 (4,066)         | 30.0 (207)                         | 40.3 (765)            | <0.0001                     |
| Ever smoked                                                 | % ( <i>n</i> )    | 30.3 (2,391)         | 29.9 (159)                         | 29.6 (370)            | 0.08                        |
| Use of oral glucose-lowering drugs at baseline <sup>b</sup> | % ( <i>n</i> )    | 89.0 (6,835)         | 89.8 (371)                         | 97.6 (1,641)          | <0.0001                     |
| In the two most deprived SIMD quintiles                     | % ( <i>n</i> )    | 47.5 (4,872)         | 39.4 (272)                         | 49.5 (940)            | <0.0001                     |

<sup>a</sup>Age- and sex-adjusted *p* values are for tests of whether the overall variation between groups is significant and are taken from linear and logistic regressions of continuous and binary variables respectively

<sup>b</sup>Excludes 15% of patients in whom oral drug use at baseline was not known with certainty  
LQ, Lower quartile; UQ, upper quartile
