# Supplementary material for: Use of insulin glargine and cancer incidence in Scotland: a study from the Scottish Diabetes Research Network Epidemiology Group
Source: Springer Nature journal article supplement (doi:10.1007/s00125-009-1453-1), 2009-07-14
Supplement: 125_2009_1453_MOESM2_ESM.pdf [file 125_2009_1453_MOESM2_ESM.pdf]

## Electronic supplementary material

**ESM Table 2** Baseline characteristics of all insulin users during follow-up by insulin glargine exposure group summarised across follow-up ( $n=49,197$ )

| Characteristic                          | Data presented as | Non-glargine insulin | Non-glargine plus glargine insulin | Insulin glargine only | <i>p</i> value <sup>a</sup> |
|-----------------------------------------|-------------------|----------------------|------------------------------------|-----------------------|-----------------------------|
| Subjects                                |                   | 64.5 (31,752)        | 30.9 (15,184)                      | 4.6 (2,261)           |                             |
| Person years                            |                   | 92,743               | 51,478                             | 3,512                 |                             |
| Sex, % women                            | % ( <i>n</i> )    | 46.3 (14,697)        | 48.1 (7,298)                       | 49.9 (1,129)          | <0.0001                     |
| Age, years                              | median (UQ, LQ)   | 60 (45,70)           | 41 (28,54)                         | 68 (58,76)            | <0.0001                     |
| BMI, kg/m <sup>2</sup>                  | mean (SD)         | 29.7 (6.3)           | 27.3 (5.5)                         | 30.3 (6.5)            | <0.0001                     |
| Systolic BP, mmHg                       | mean (SD)         | 137.0 (22.5)         | 130.2 (20.2)                       | 139.3 (24.0)          | <0.0006                     |
| Diastolic BP, mmHg                      | mean (SD)         | 75.5 (12.2)          | 75.4 (11.5)                        | 77.0 (13.1)           | <0.0001                     |
| HbA <sub>1c</sub> , %                   | mean (SD)         | 8.6 (1.7)            | 8.9 (1.6)                          | 8.9 (1.8)             | <0.0001                     |
| Duration of diabetes                    |                   |                      |                                    |                       |                             |
| ≥5 years                                | % ( <i>n</i> )    | 78.5 (24,609)        | 77.2 (11,615)                      | 82.6 (1,852)          | <0.0001                     |
| Prior insulin                           |                   |                      |                                    |                       |                             |
| ≥5years on insulin                      | % ( <i>n</i> )    | 25.0 (7,922)         | 37.2 (5,656)                       | 4.2 (95)              | <0.0001                     |
| Prior cancer                            |                   |                      |                                    |                       |                             |
| Ever                                    | % ( <i>n</i> )    | 5.9 (1,879)          | 1.9 (295)                          | 8.7 (197)             | <0.0001                     |
| ≤5 years ago                            | % ( <i>n</i> )    | 3.2 (1,015)          | 1.0 (155)                          | 5.0 (113)             | 0.0001                      |
| Prior CVD                               | % ( <i>n</i> )    | 24.9 (7,902)         | 7.2 (1,093)                        | 32.4 (733)            | <0.0001                     |
| Ever smoked                             | % ( <i>n</i> )    | 30.3 (6,920)         | 29.3 (3,506)                       | 28.8 (439)            | <0.0001                     |
| Diabetes type:                          |                   |                      |                                    |                       |                             |
| Type 1                                  | % ( <i>n</i> )    | 23.0 (7312)          | 58.6 (8,892)                       | 1.7 (38)              |                             |
| Type 2                                  | % ( <i>n</i> )    | 77.0 (24,440)        | 41.4 (6,292)                       | 98.3 (2,223)          | <0.0001                     |
| On three or more glucose-lowering drugs | % ( <i>n</i> )    | 35.5 (11,277)        | 13.3 (2,020)                       | 73.2 (1,656)          | <0.0001                     |
| In the two most deprived SIMD quintiles | % ( <i>n</i> )    | 47.9 (15,215)        | 37.1 (5,634)                       | 50.2 (1,135)          | <0.0001                     |

<sup>a</sup>Age- and sex-adjusted *p* values are for tests of whether the overall variation between groups is significant and are taken from linear and logistic regressions of continuous and binary variables respectively

LQ, Lower quartile; UQ, upper quartile
