# Supplementary material for: Use of insulin glargine and cancer incidence in Scotland: a study from the Scottish Diabetes Research Network Epidemiology Group
Source: Springer Nature journal article supplement (doi:10.1007/s00125-009-1453-1), 2009-07-14
Supplement: 125_2009_1453_MOESM3_ESM.pdf [file 125_2009_1453_MOESM3_ESM.pdf]

## Electronic supplementary material

**ESM Table 3** Total cancers by insulin glargine group with insulin exposure, summarised across 147,736 person-years of follow up ( $n=49,197$ )

| Characteristic                       | Data presented as | Non-glargine insulin | Non-glargine plus glargine insulin |            | Insulin glargine only |           |
|--------------------------------------|-------------------|----------------------|------------------------------------|------------|-----------------------|-----------|
|                                      | <i>n</i>          | 31,752               | 15,184                             |            | 2,261                 |           |
|                                      | Person-years      | 92,743               | 51,478                             |            | 3,515                 |           |
| All cancers                          | <i>n</i> (%)      | 1273 (4.0)           | 156 (1.0)                          |            | 94 (4.2)              |           |
| Model 1 <sup>a</sup> ( $n=49,197$ )  | HR (95% CI)       | Reference            | 0.53 (0.45, 0.63)                  | $p<0.0001$ | 1.28 (1.04, 1.59)     | $p=0.022$ |
| Model 2 <sup>b</sup> ( $n= 49,197$ ) | HR (95% CI)       | Reference            | 0.52 (0.44, 0.62)                  | $p<0.0001$ | 1.39 (1.11, 1.73)     | $p=0.004$ |
| Model 3 <sup>c</sup> ( $n=35,389$ )  | HR (95% CI)       | Reference            | 0.59 (0.49, 0.71)                  | $p<0.0001$ | 1.54 (1.20, 1.97)     | $p=0.001$ |
| Model 4 <sup>d</sup> ( $n=26,420$ )  | HR (95% CI)       | Reference            | 0.65 (0.53, 0.81)                  | $p<0.0001$ | 1.49 (1.09, 2.03)     | $p=0.012$ |

<sup>a</sup>Model 1 adjusts for prior cancer, type of diabetes, calendar year and sex, and has attained age as timescale

<sup>b</sup>Model 2 further adjusts for metformin, sulfonylurea and other oral hypoglycaemic drugs at baseline

<sup>c</sup>Model 3 further adjusts for diabetes duration, HbA<sub>1c</sub>, diastolic BP, systolic BP and deprivation quintile

<sup>d</sup>Model 4 further adjusts for smoking ever and BMI, but note the reduction in available sample size
