# Supplementary material for: Use of insulin glargine and cancer incidence in Scotland: a study from the Scottish Diabetes Research Network Epidemiology Group
Source: Springer Nature journal article supplement (doi:10.1007/s00125-009-1453-1), 2009-07-14
Supplement: 125_2009_1453_MOESM4_ESM.pdf [file 125_2009_1453_MOESM4_ESM.pdf]

## Electronic supplementary material

**ESM Table 4** Site-specific cancers by insulin glargine group with insulin exposure summarised across the follow-up

|                                 | Data presented as | Non-glargine insulin | Non-glargine plus glargine insulin |         | Insulin glargine only |         |
|---------------------------------|-------------------|----------------------|------------------------------------|---------|-----------------------|---------|
| Breast cancer                   |                   | 132 (0.9)            | 33 (0.45)                          |         | 10 (0.9)              |         |
| Subjects = 23,121 <sup>c</sup>  |                   | 14,695               | 7,298                              |         | 1,128                 |         |
| Person years = 70,263           |                   | 43,261               | 25,102                             |         | 1,899                 |         |
| Model 1 <sup>a</sup> (n=23,121) | HR (95% CI)       | Reference            | 0.86 (0.57, 1.29)                  | p=0.46  | 1.33(0.69, 2.56)      | p=0.39  |
| Model 2 <sup>b</sup> (n=23,121) | HR (95% CI)       | Reference            | 0.85 (0.57, 1.28)                  | p=0.44  | 1.54 (0.79, 3.02)     | p=0.21  |
| Model 3 <sup>c</sup> (n=16,756) | HR (95% CI)       | Reference            | 1.00 (0.64, 1.56)                  | p=0.9   | 1.93 (0.97, 3.84)     | p=0.059 |
| Model 4 <sup>d</sup> (n=12,425) | HR (95% CI)       | Reference            | 1.19 (0.72, 1.94)                  | p=0.50  | 1.99 (0.88, 4.49)     | p=0.099 |
| Prostate                        | n (%)             | 82 (0.48)            | 13 (0.16)                          |         | 5 (0.44)              |         |
| Subjects = 26,068 <sup>e</sup>  |                   | 17,050               | 7,886                              |         | 1,132                 |         |
| Person years = 78,495           |                   | 50,269               | 26,550                             |         | 1,676                 |         |
| Model 1 <sup>a</sup> (n=26,068) | HR (95% CI)       | -                    | 1.05 (0.58, 1.91)                  | p=0.9   | 1.14 (0.45, 2.84)     | p=0.79  |
| Colorectal                      | n (%)             | 171 (0.54)           | 20 (0.13)                          |         | 12 (0.53)             |         |
| Model 1 <sup>a</sup> (n=49,190) | HR (95% CI)       | -                    | 0.58 (0.36, 0.93)                  | p=0.025 | 1.13 (0.62, 2.04)     | p=0.69  |
| Pancreatic                      | n (%)             | 100 (0.31)           | 2 (0.01)                           |         | 8 (0.35)              |         |
| Model 1 <sup>a</sup> (n=49,197) | HR (95% CI)       | -                    | 0.11 (0.03,0.45)                   | p=0.002 | 1.34 (0.64, 2.78)     | p=0.44  |

<sup>a</sup>Model 1 adjusts for prior cancer, type of diabetes, calendar year and sex. Timescale is age

<sup>b</sup>Model 2 further adjusts for metformin, sulfonylurea and other oral hypoglycaemic drugs at baseline

<sup>c</sup>Model 3 further includes diabetes duration, HbA<sub>1c</sub>, systolic BP, diastolic BP and deprivation quintile

<sup>d</sup>Model 4 further adjusts for smoking ever and BMI but note the reduction in sample size due to missing covariates

<sup>e</sup>Excludes 53 women and 78 men without follow-up data
